# Supplementary material
Source: Springer Nature journal article supplement (https://www.springermedizin.de/resource/supplementary/12913_2013_3028_MOESM1_ESM.pdf/9533316)

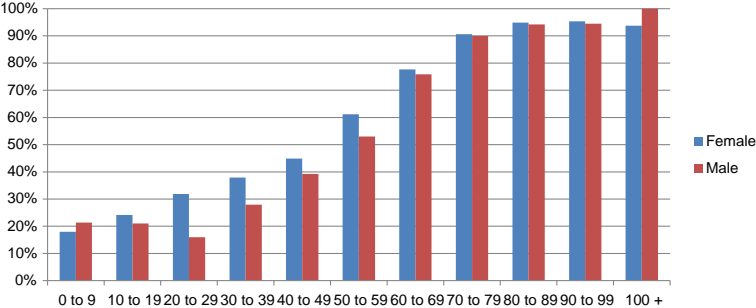

Supplement: MOESM1 [file 9533316]
